# Supplementary material
Source: MDPI journal article supplement (https://www.mdpi.com/2073-4433/8/4/64)
Supplement: s1 [file s1]

# Supplementary Materials: Global Climate Responses to Land Use and Land Cover Changes Over the Past Two Millennia

Mi Yan, Jian Liu and Zhiyuan Wang

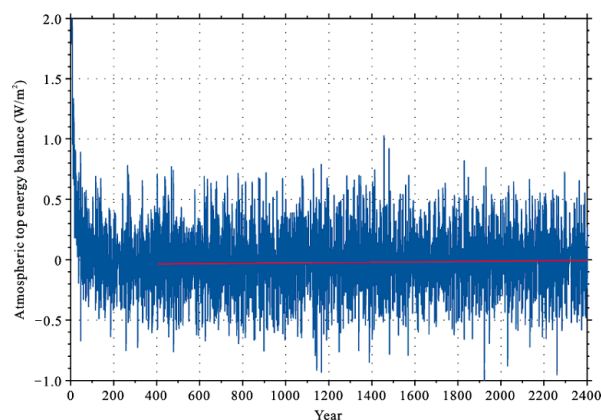

**Figure S1.** Time series of energy balance ( $\text{W/m}^2$ ) at the top of atmosphere (TOA) from CTRL run. The blue line represents annual mean TOA, the red line represents its linear trend in the last 2000 years.

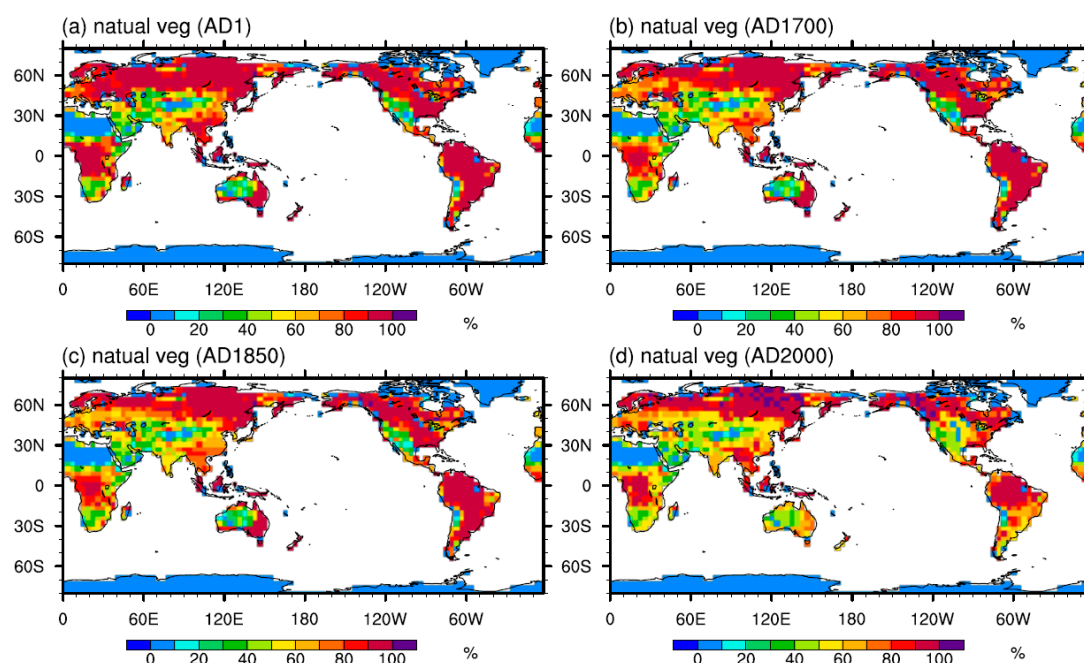

**Figure S2.** Spatial distributions of fractions of natural vegetation types during four periods. (a)–(d) represent 1AD, 1700AD, 1850AD and 2000AD respectively, used in the LU run.

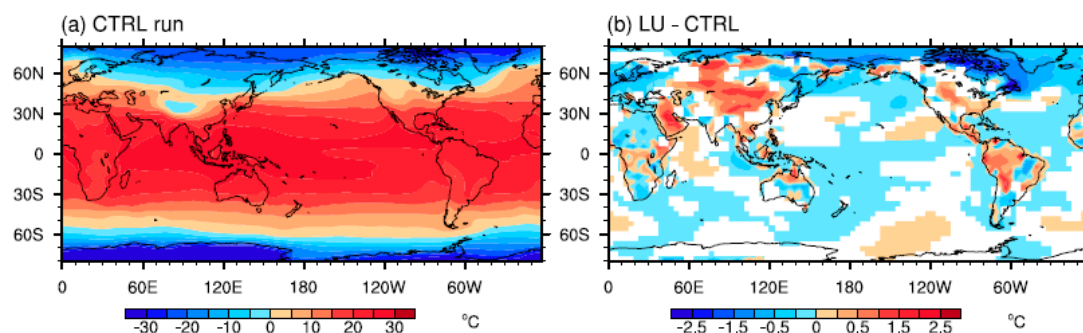

**Figure S3.** Spatial distributions of the annual mean surface temperature ( $^{\circ}\text{C}$ ) derived from the CTRL run (a) and the temperature difference ( $^{\circ}\text{C}$ ) between the LU run and CTRL run (b). Only those areas exceed the 95% confidence level are shown in (b).

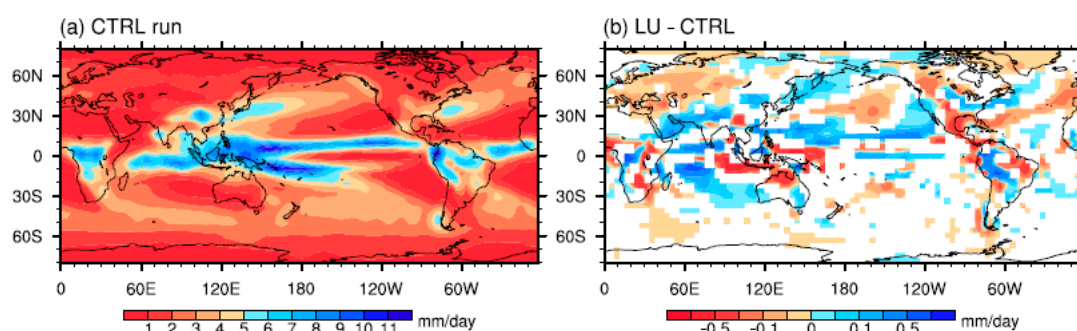

**Figure S4.** Spatial distributions of the annual mean precipitation rate (mm/day) derived from the CTRL run (a) and the precipitation difference (mm/day) between the LU run and CTRL run (b). Only those areas exceed the 95% confidence level are shown in (b).

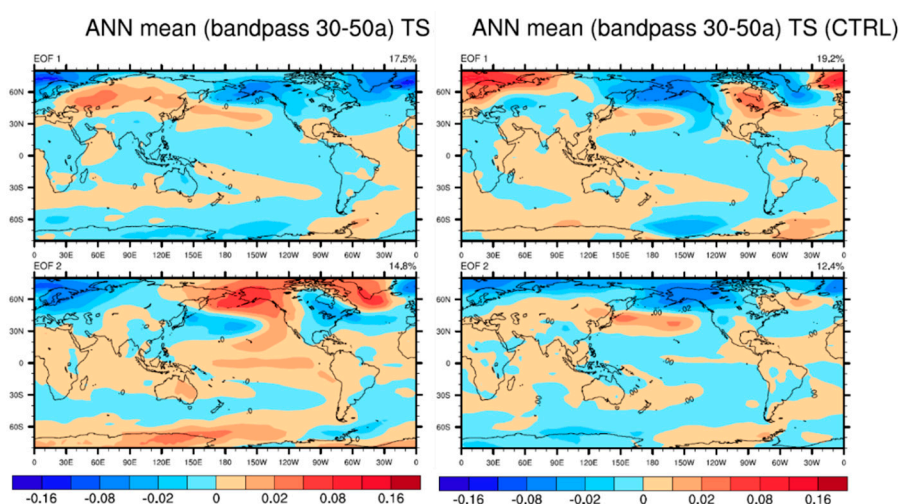

**Figure S5.** Spatial pattern of the leading EOF modes (EOF1 and EOF2) of annual surface temperature, after 30–50 years' band-pass filter. Left panels are derived from the LU run, right panels are derived from the CTRL run.

**Table S1.** Vegetation types' ID in CESM land component and in Kaplan's classification.

| CLM4's ID   | 1          | 2          | 3 | 4 | 5 | 6 | 7          | 8          | 9           | 10         | 11         | 12          | 13 | 14 | 15 | 16 |
|-------------|------------|------------|---|---|---|---|------------|------------|-------------|------------|------------|-------------|----|----|----|----|
| Kaplan's ID | 5<br>(50%) | 5<br>(50%) | 6 | 1 | 3 | 2 | 4<br>(50%) | 4<br>(50%) | 11<br>(50%) | 8<br>(50%) | 8<br>(50%) | 11<br>(50%) | 9  | 10 | 12 | /  |

**Table S2.** The climatology of temperature and precipitation derived from CTRL and LU run and the difference for every 100 years during the last 1800 years.

| Time Step | CTRL       |                | LU         |                | Difference |                |
|-----------|------------|----------------|------------|----------------|------------|----------------|
|           | temp(degC) | precip(mm/day) | temp(degC) | precip(mm/day) | temp(degC) | precip(mm/day) |
| 1         | 12.377     | 2.673          | 12.411     | 2.673          | 0.033 *    | -2.79E-05      |
| 2         | 12.412     | 2.677          | 12.393     | 2.673          | -0.019     | -0.005 *       |
| 3         | 12.426     | 2.678          | 12.423     | 2.673          | -0.004     | -0.005 *       |
| 4         | 12.408     | 2.677          | 12.397     | 2.673          | -0.012     | -0.003 *       |
| 5         | 12.390     | 2.675          | 12.428     | 2.676          | 0.038 *    | 0.001          |
| 6         | 12.405     | 2.677          | 12.379     | 2.673          | -0.026     | -0.004 *       |
| 7         | 12.420     | 2.677          | 12.379     | 2.672          | -0.041 *   | -0.005 *       |
| 8         | 12.441     | 2.678          | 12.421     | 2.674          | -0.020     | -0.004 *       |
| 9         | 12.443     | 2.679          | 12.380     | 2.672          | -0.063 *   | -0.008 *       |
| 10        | 12.421     | 2.678          | 12.359     | 2.671          | -0.061 *   | -0.006 *       |
| 11        | 12.426     | 2.678          | 12.367     | 2.671          | -0.060 *   | -0.007 *       |
| 12        | 12.462     | 2.679          | 12.357     | 2.670          | -0.106 *   | -0.009 *       |
| 13        | 12.452     | 2.679          | 12.360     | 2.671          | -0.092 *   | -0.008 *       |
| 14        | 12.509     | 2.682          | 12.360     | 2.670          | -0.149 *   | -0.011 *       |
| 15        | 12.471     | 2.680          | 12.360     | 2.671          | -0.111 *   | -0.009 *       |
| 16        | 12.481     | 2.681          | 12.383     | 2.671          | -0.098 *   | -0.009 *       |
| 17        | 12.418     | 2.677          | 12.340     | 2.669          | -0.079 *   | -0.008 *       |
| 18        | 12.458     | 2.679          | 12.324     | 2.668          | -0.134 *   | -0.012 *       |

\* denotes the value passed the t-test at 95% confidence level.

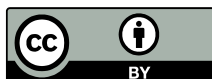

© 2017 by the authors; licensee MDPI, Basel, Switzerland. This article is an open access article distributed under the terms and conditions of the Creative Commons Attribution (CC BY) license (<http://creativecommons.org/licenses/by/4.0/>).
